# Supplementary material for: Testing an Integrated Model of Program Implementation: the Food, Health & Choices School-Based Childhood Obesity Prevention Intervention Process Evaluation
Source: Springer Nature journal article supplement (doi:10.1007/s11121-016-0736-2), 2016-12-05
Supplement: MOESM1 [file 11333582]

Supplementary Material

*Figure S.1*

*Food, Health & Choices* Study Design

|  | Curriculum | | | | | | Wellness | | | | | | | | | Curriculum+Wellness | | | | | | | | | Control | | | | | | | | |
| --- | --- | --- | --- | --- | --- | --- | --- | --- | --- | --- | --- | --- | --- | --- | --- | --- | --- | --- | --- | --- | --- | --- | --- | --- | --- | --- | --- | --- | --- | --- | --- | --- | --- |
| school level |  |  |  |  |  | |  | |  | |  | |  | |  |  | |  | |  | |  | |  |  | | |  | | |  |  |  |
| n=5 | | | | | | n=5 | | | | | | | | | n=5 | | | | | | | | | n=5 | | | | | | | | |
| classroom level |  |  |  |  |  |  | |  | |  | |  | |  | |  |  | |  | |  | |  | |  | |  | | |  | |  |  |
| n=14 | | | | | n=15 | | | | | | | | | | n=16 | | | | | | | | | n=14 | | | | | | | | |
| student level | n=38 | n=105 | n=102 | n=63 | n=53 | n=48 | | n=115 | | n=125 | | n=41 | | n=26 | | n=60 | n=100 | | n=136 | | n=53 | | n=52 | | n=48 | n=67 | | | n=35 | | | n=79 | n=149 |
| n=361 | | | | | n=355 | | | | | | | | | | n=401 | | | | | | | | | n=378 | | | | | | | | |

Note: Numbers reported in figure reflect multiple imputation

**Exploratory Factor Analysis**

A correlation matrix of 48 baseline Food, Health & Choices Questionnaire (FHC-Q) items that measured EBRB was examined and three items were eliminated from the analysis: Milk consumption frequency and two items about choosing healthier options at fast food outlets. Milk consumption frequency was eliminated because it was uncorrelated with any other behavioral outcomes and the items about choosing healthier fast food options were eliminated because they were more correlated with unhealthy behaviors than other healthy behaviors, suggesting that they were better indicators of fast food consumption in general. Data were analyzed in MPlus, using maximum likelihood (ML) missing data imputation (Muthén & Muthén, 2012). The remaining 45 variables were included in an initial, unrotated 45-factor solution. The scree plot and eigenvalues, along with the goal of reducing outcome parameters, were considered and a 3-factor solution was deemed appropriate. A 3-factor solution was generated. Due to the presumed interrelation among factors, Promax rotation, which is commonly used to optimally differentiate factors in a factor analysis, was employed (Field, Miles & Field, 2012).

An exploratory factor analysis was conducted. The scree plot, pictured in Figure S.1 was used to determine the appropriate factor solution. A 3-Factor solution was determined to be ideal. The factor loadings are summarized in Table S.1. The factor loadings were then used to calculate baseline and posttest EBRB scales with multiple imputation in SPSS (n=1137).

**References**

Field, A. Miles, J., & Field, Z. (2012). *Discovering statistics using* *R*. London, UK: Sage.

IBM Corp. (2013). IBM SPSS Statistics for Macintosh, Version 22.0. Armonk, NY: IBM Corp.

Muthén, L.K. & Muthén, B.O. (2012). *MPlus User’s Guide* (7th ed.). Los Angeles, CA: Muthén & Muthén.

Table S.1

*Items and Factor Loadings for Promax Three-Factor Solution for the FHC-Q (n=1137)*

|  | **Factor Loadings** | | |
| --- | --- | --- | --- |
| **Item** | 1 | 2 | 3 |
| *In the past week I ate/did…* |  |  |  |
| Apples | **.553** | -.029 | .007 |
| Grapes | **.553** | .066 | .036 |
| Oranges | **.522** | .069 | .005 |
| Bananas | **.519** | .089 | .001 |
| Fruits at breakfast | **.577** | -.074 | .010 |
| Fruits at lunch | **.410** | -.114 | .054 |
| Broccoli | **.475** | -.128 | .031 |
| Carrots | **.541** | -.120 | .049 |
| Green leafy vegetables | **.445** | -.158 | -.002 |
| Tomatoes | **.434** | -.084 | .037 |
| Vegetables at lunch | **.516** | -.131 | .008 |
| Vegetables at dinner | **.496** | -.227 | .018 |
| Watched TV | -.145 | **.513** | -.076 |
| Played video games | -.073 | **.553** | .005 |
| Things that got me up and moving | **.402** | -.009 | -.071 |
| Things that made my heart beat a little faster | **.384** | .222 | -.095 |
| Things that got my heart beating really fast | **.356** | .272 | -.099 |
| *How long/How much at one time?* |  |  |  |
| Fruits | **.418** | -.013 | .027 |
| Vegetables | **.409** | -.231 | .010 |
| Watch TV | -.200 | **.512** | -.016 |
| Play video games | -.063 | **.505** | .048 |
| Things that got me up and moving | **.447** | .066 | -.101 |
| Things that made my heart beat a little faster | **.414** | .257 | -.116 |
| Things that got my heart beating really fast | **.349** | .343 | -.133 |
| *In the past week, I drank/ate…* |  |  |  |
| Fruit drinks and sweetened iced teas | -.096 | **.583** | .104 |
| Sodas | -.100 | **.667** | .075 |
| Sports drinks | .325 | **.387** | .044 |
| Flavored water | .293 | **.374** | .038 |
| Potato, tortilla, corn chips, or puffs | -.034 | **.678** | .120 |
| Other salty snacks | .135 | **.560** | .092 |
| Candy | -.078 | **.720** | .069 |
| Donuts and pastries | .036 | **.625** | .184 |
| Cookies, brownies, pies, or cakes | .045 | **.617** | .177 |
| Ice cream, milkshakes, or popsicles | .075 | **.553** | .165 |
| Fast food | .007 | **.437** | .366 |
| *How much at one time?* |  |  |  |
| Sodas, fruit drinks, or iced teas | -.064 | .117 | **.636** |
| Sports drinks or flavored waters | .256 | .112 | **.392** |
| Chips and other salty snacks | -.055 | .108 | **.675** |
| Candy | -.058 | .122 | **.661** |
| Baked goods | .015 | .080 | **.650** |
| Ice cream | .014 | .087 | **.682** |
| Fast food burgers or sandwiches | .038 | .061 | **.673** |
| French fries | .031 | .083 | **.722** |
| Fountain soda | -.005 | .078 | **.719** |
| Combo meals | .042 | .088 | **.549** |

*Note.* Boldface indicates highest factor loadings. FHC-Q= *Food, Health & Choices Questionnaire;* Factor 1=Healthy Behavior (HB); Factor 2=Unhealthy Activity Behavior and Eating Behavior Frequency (UBF); Factor 3=Unhealthy Eating Behavior Portion Size (UBS)
